# Supplementary material for: Full-Length Genomic RNA of Foot-and-Mouth Disease Virus is Infectious for Cattle by Injection
Source: Preprints.org preprint supplement (doi:10.20944/preprints202207.0358.v1), 2022-07-25
Supplement: Supplementary file 1 [file supplementary]

## Sheet: Table S1_Body temperatures
Table S1: Body temperatures
Rectal temperatures of animals in the first experiment
Animal No.	dpi
	-3	-2	-1	0	1	2	3
248	39.1	38.6	39.1	39.3	39.7	41.4	/
249	38.6	38.7	39	38.9	39.2	41.3	40.1
251	38.8	39.1	38.8	38.8	40.8	41.2	40
260	38.7	38.8	39.2	39.4	39.2	40.3	40.5
262	39.2	39.2	39.2	39	39.3	41.6	41.2
263	38.8	39	38.9	38.9	39.3	41.2	41.4

## Sheet: Table S2_Clinical scores
Table S2: Clinical scores
Evaluation criteria and aggregate clinical scores calculated for animals in the first experiment
Evaluation criteria
General attitude (GA)
0	The animal appears lively, attentive, curious and shows interest in its environment
1	The animal appears slightly weary and unwilling to move
2	The animal appears tired and disinterested and separates itself from the group
3	The animal is lethargic and barely reacts to stimuli
Euthanasia	The animal does not respond to stimuli, lies in lateral position and/or suffers from severe dyspnea
Feed intake (FI)
0	The animal immediately comes to the trough and eats voraciously
1	The animal comes to the trough hesitantly and eats slowly
2	The animal does not come to the trough by itself, but takes offered food and water
3	The animal does not eat and drink (1st day)
Euthanasia	The animal does not eat and drink (2nd day in a row)
Gait (G)
0	The animal stands up spontaneously, moves smoothly and puts equal weight on all limbs
1	The animal stands up hesitantly, moves stiffly and is lame in one limb
2	The animal is very reluctant to get up, barely moves, it is lame on one or more limbs and the back is arched
3	The animal does not stand up by itself, can stand only with help, is severely lame and does not put any weight on one limb
Euthanasia	The animal is not able to stand up even with help; sloughing of hooves
Body temperature (BT)
0	<39.5°C
1	39.5-40.0°C
2	40.1-40.5°C
3	>40.5°C
Euthanasia	<36.0°C
Aggregate score
Clinical score	0	1	2	3	4	5	6	7	8	9	10	11	12
												Euthanasia
Impact	none	low	moderate				severe
Evaluation of the animals
Animal No.	Parameter	dpi
		-3	-2	-1	0	1	2	3
248	GA	0	0	0	0	1	3	/
	FI	0	0	0	0	1	2	/
	G	0	0	0	0	1	2	/
	BT	0	0	0	0	1	3	/
	Total	0	0	0	0	4	10	/
249	GA	0	0	0	0	1	1	1
	FI	0	0	0	0	1	1	1
	G	0	0	0	0	1	1	1
	BT	0	0	0	0	0	3	2
	Total	0	0	0	0	3	6	5
251	GA	0	0	0	0	1	1	1
	FI	0	0	0	0	1	1	1
	G	0	0	0	0	1	1	1
	BT	0	0	0	0	3	3	1
	Total	0	0	0	0	6	6	4
260	GA	0	0	0	0	1	1	1
	FI	0	0	0	0	1	1	1
	G	0	0	0	0	1	1	1
	BT	0	0	0	0	0	2	2
	Total	0	0	0	0	3	5	5
262	GA	0	0	0	0	1	1	1
	FI	0	0	0	0	1	1	1
	G	0	0	0	0	1	1	1
	BT	0	0	0	0	0	3	3
	Total	0	0	0	0	3	6	6
263	GA	0	0	0	0	1	1	1
	FI	0	0	0	0	1	1	1
	G	0	0	0	0	1	1	1
	BT	0	0	0	0	0	3	3
	Total	0	0	0	0	3	6	6

## Sheet: Table S3_FMDV RT-qPCR results
Table S3: FMDV RT-qPCR results
PCR results for samples collected in the first animal trial
Animal No.	Sample Matrix	0 dpi, before infection	0 dpi, after infection	1 dpi	2 dpi
248	Serum	no Cq	-	28.91	26.44
	Saliva	no Cq	no Cq	16.86	22.83
249	Serum	no Cq	-	32.04	27.92
	Saliva	no Cq	no Cq	29.17	20.7
251	Serum	no Cq	-	29.43	26.43
	Saliva	no Cq	41.75	30.13	23.51
260	Serum	no Cq	-	37.72	30.27
	Saliva	no Cq	no Cq	37.75	22.94
262	Serum	no Cq	-	31.4	30.82
	Saliva	no Cq	no Cq	34.55	20.79
263	Serum	no Cq	-	35.2	30.59
	Saliva	no Cq	no Cq	34.23	22.95
